# Supplementary material
Source: PubMed Central journal article supplement (PMC6490183)
Supplement: NIHMS1021660-supplement-1.pdf [file NIHMS1021660-supplement-1.pdf]

Figure S1

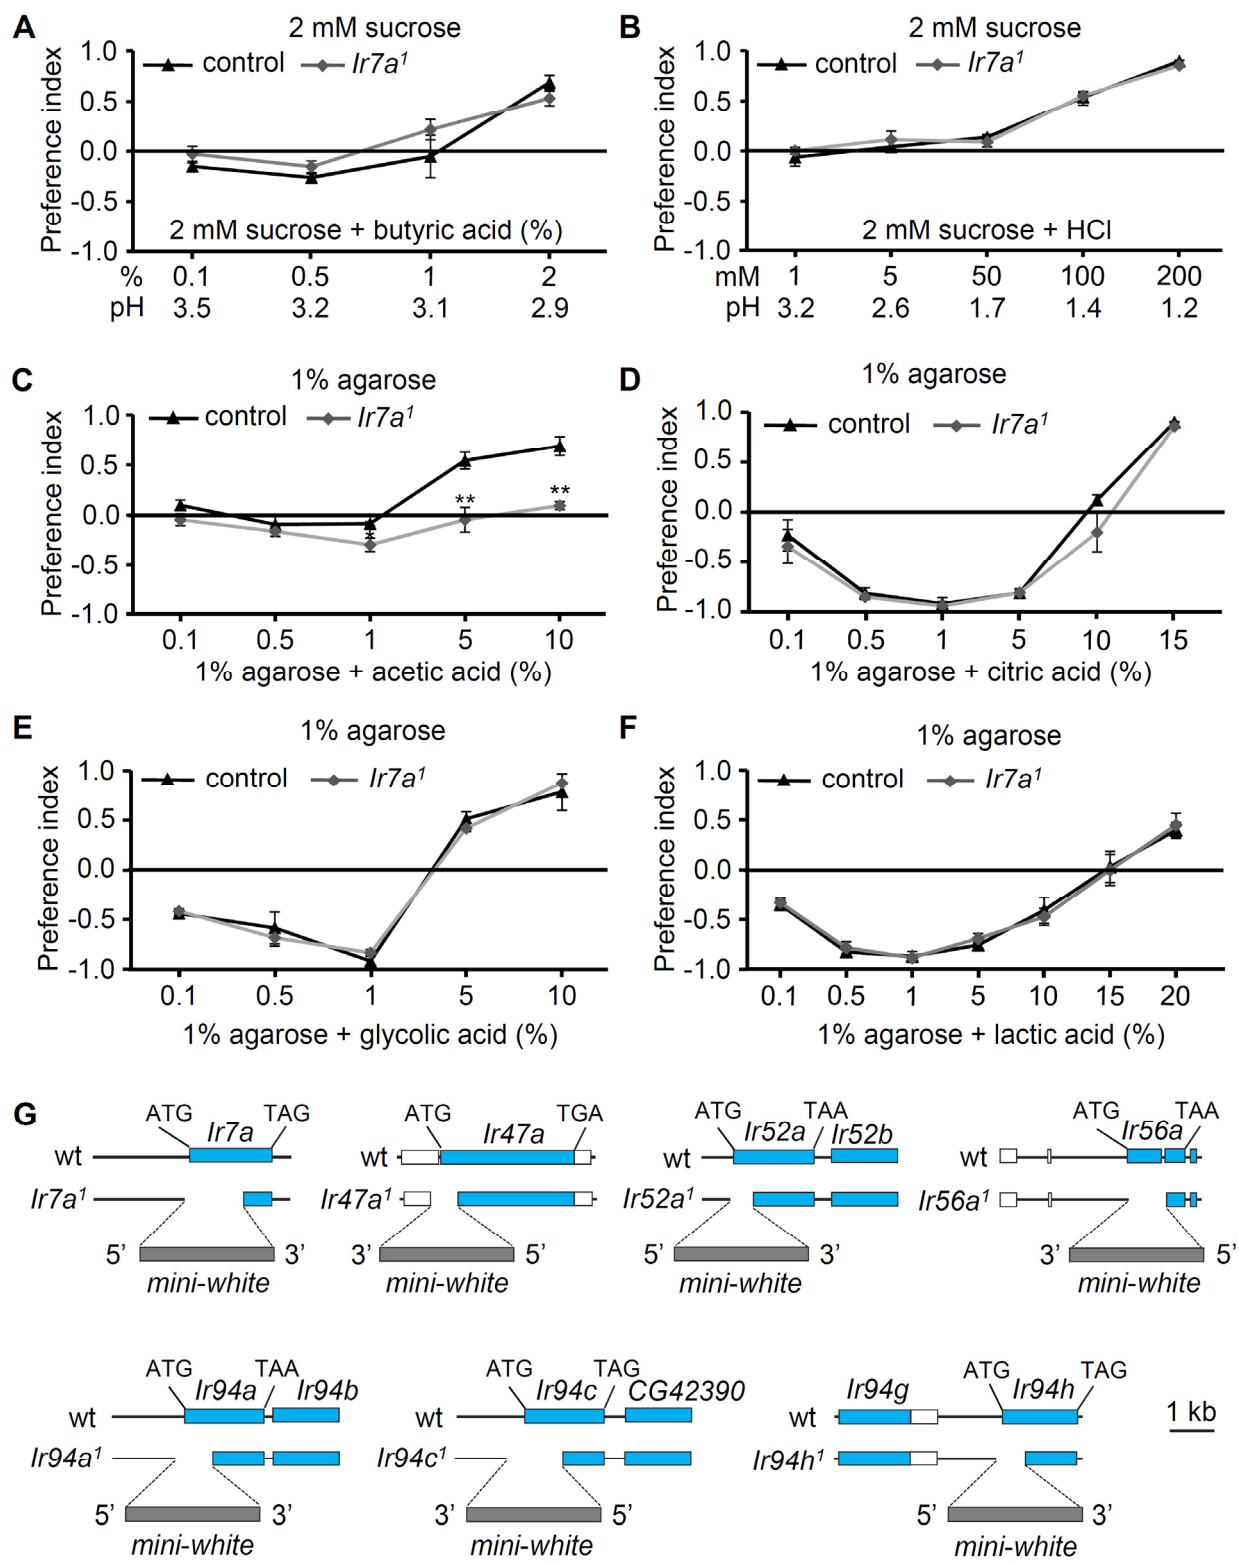

**Figure S1. Behavioral preferences of flies to acids and generation of *Ir* mutants.**  
**Related to Figure 1.**

(A—B) Two-way choice feeding assays showing preferences of control (*w<sup>1118</sup>*) and *Ir7a<sup>1</sup>* flies upon presentation of 2 mM sucrose alone, versus 2 mM sucrose with the indicated concentrations of (A) butyric acid, and (B) HCl. n=4-6.

(C—F) Preferences of control (*w<sup>1118</sup>*) and *Ir7a<sup>1</sup>* flies to the indicated concentrations of (C) acetic acid, (D) citric acid, (E) glycolic acid, and (F) lactic acid without sucrose. n=4-6.

(G) *Ir* mutants generated by ends-out homologous recombination.

The error bars indicate SEMs. The asterisks indicate significant differences from the controls using ANOVA tests with Scheffe's *post hoc* analyses between wild-type and mutants. (\*\*p < 0.01).

## Figure S2

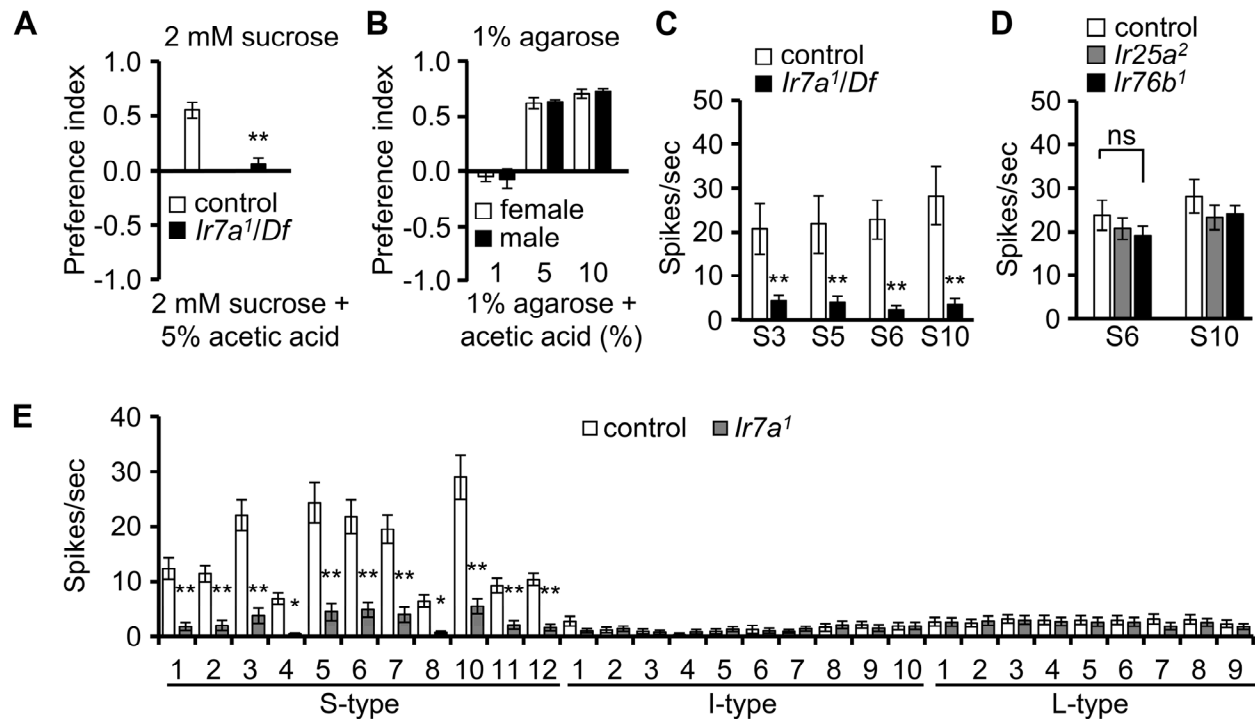

**Figure S2. Analyses with control flies after starvation, *Ir7a1/Df*, *Ir25a2*, *Ir76b1* flies, and behavioral response of bitter GRN ablated and rescue flies in the absence of sucrose. Related to Figures 1 and 2.**

(A) Two-way choice feeding assay using flies harboring the *Ir7a1* mutation *in trans* with a deficiency that removes *Ir7a* (*Ir7a1/Df*). n=4-6.

(B) Two-way choice assay performed separately with males and females. n=4-6.

(C) Frequencies of action potentials elicited by controls, and *Ir7a1/Df* flies. n=10-12.

(D) Frequencies of 1% acetic acid-induced action potentials elicited from S6 and S10 sensilla from control (*w<sup>1118</sup>*), *Ir25a2*, and *Ir76b1* flies. n=20.

(E) Average frequencies of action potentials elicited from S, I, and L type sensilla in response to 1% acetic acid after the control and *Ir7a1* flies were starved for 24 hrs. n=18-30.

The error bars indicate SEMs. The asterisks indicate significant differences from the controls using ANOVA tests with Scheffe's *post hoc* analyses. \*\*p < 0.01.

Figure 3 consists of seven bar charts (A-G) showing the preference index for various *Drosophila* strains under different sucrose and acid conditions. The y-axis for all charts is 'Preference index' ranging from -1.0 to 1.0. The x-axis for all charts lists the strains: control, *Ir7a<sup>1</sup>*, *Ir25a<sup>2</sup>*, *Ir47a<sup>1</sup>*, *Ir52a<sup>1</sup>*, *Ir56a<sup>1</sup>*, *Ir56b<sup>1</sup>*, *Ir60b<sup>1</sup>*, *Ir76b<sup>1</sup>*, *Ir94a<sup>1</sup>*, *Ir94c<sup>1</sup>*, and *Ir94h<sup>1</sup>*.

- A** 2 mM sucrose (top) and 2 mM sucrose + 5% glycolic acid (bottom).
- B** 2 mM sucrose (top) and 2 mM sucrose + 10% citric acid (bottom).
- C** 2 mM sucrose (top) and 2 mM sucrose + 20% lactic acid (bottom).
- D** 2 mM sucrose (top) and 2 mM sucrose + 5% tartaric acid (bottom).
- E** 2 mM sucrose (top) and 2 mM sucrose + 2% propionic acid (bottom).
- F** 2 mM sucrose (top) and 2 mM sucrose + 2% butyric acid (bottom).
- G** 2 mM sucrose (top) and 2 mM sucrose + 100 mM HCl (bottom).

In all charts, the preference index is generally higher for the 2 mM sucrose condition compared to the sucrose + acid condition. The preference index is also generally higher for the control strain compared to the mutant strains.

**Figure S3. Screening of *Ir* mutants to test avoidances to the indicated acids using binary choice assays. Related to Figure 1.**

The flies were given a choice between 2 mM sucrose versus 2 mM sucrose and the indicated acids. n=4-6.

Significant differences between the controls and the mutants were tested using ANOVA tests with Scheffe's *post hoc* analyses.

**Figure S4**

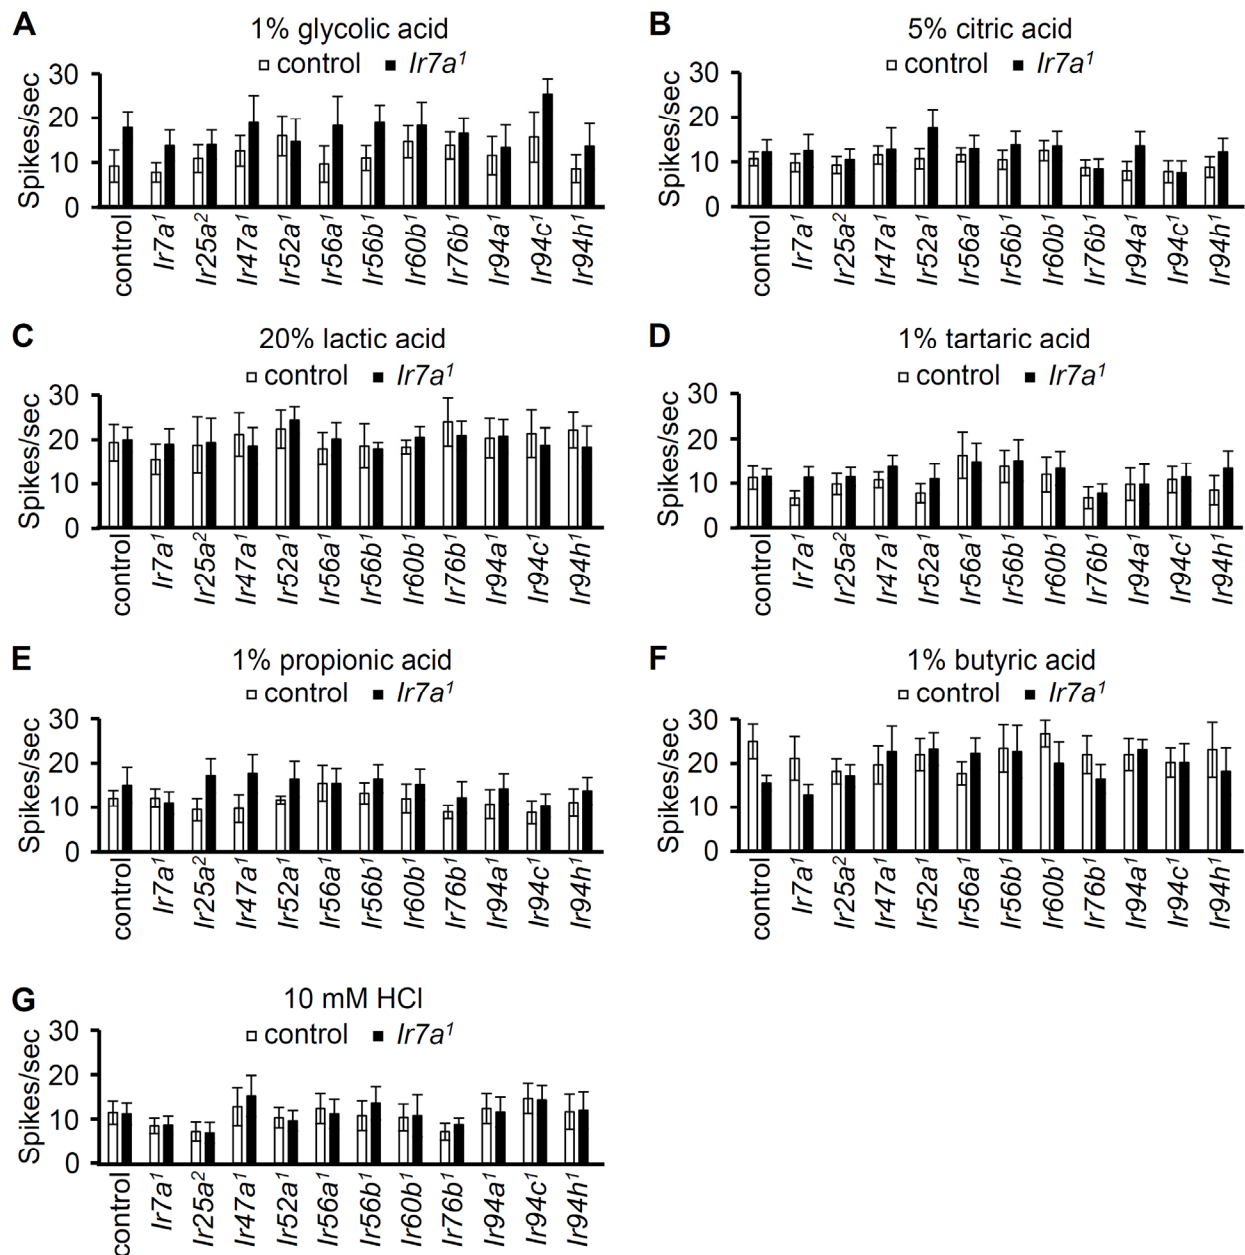

**Figure S4. Acid-induced action potentials displayed by *lr* mutants. Related to Figure 2.**

Frequencies of action potentials obtained by performing tip recording on S6 and S10 sensilla from control (*w<sup>1118</sup>*) and *lr* mutant flies in response to the indicated concentrations of organic acids and HCl. n=12-20.

Significant differences between the controls and the mutants were tested using ANOVA tests with Scheffe's *post hoc* analyses.

**Figure S5**

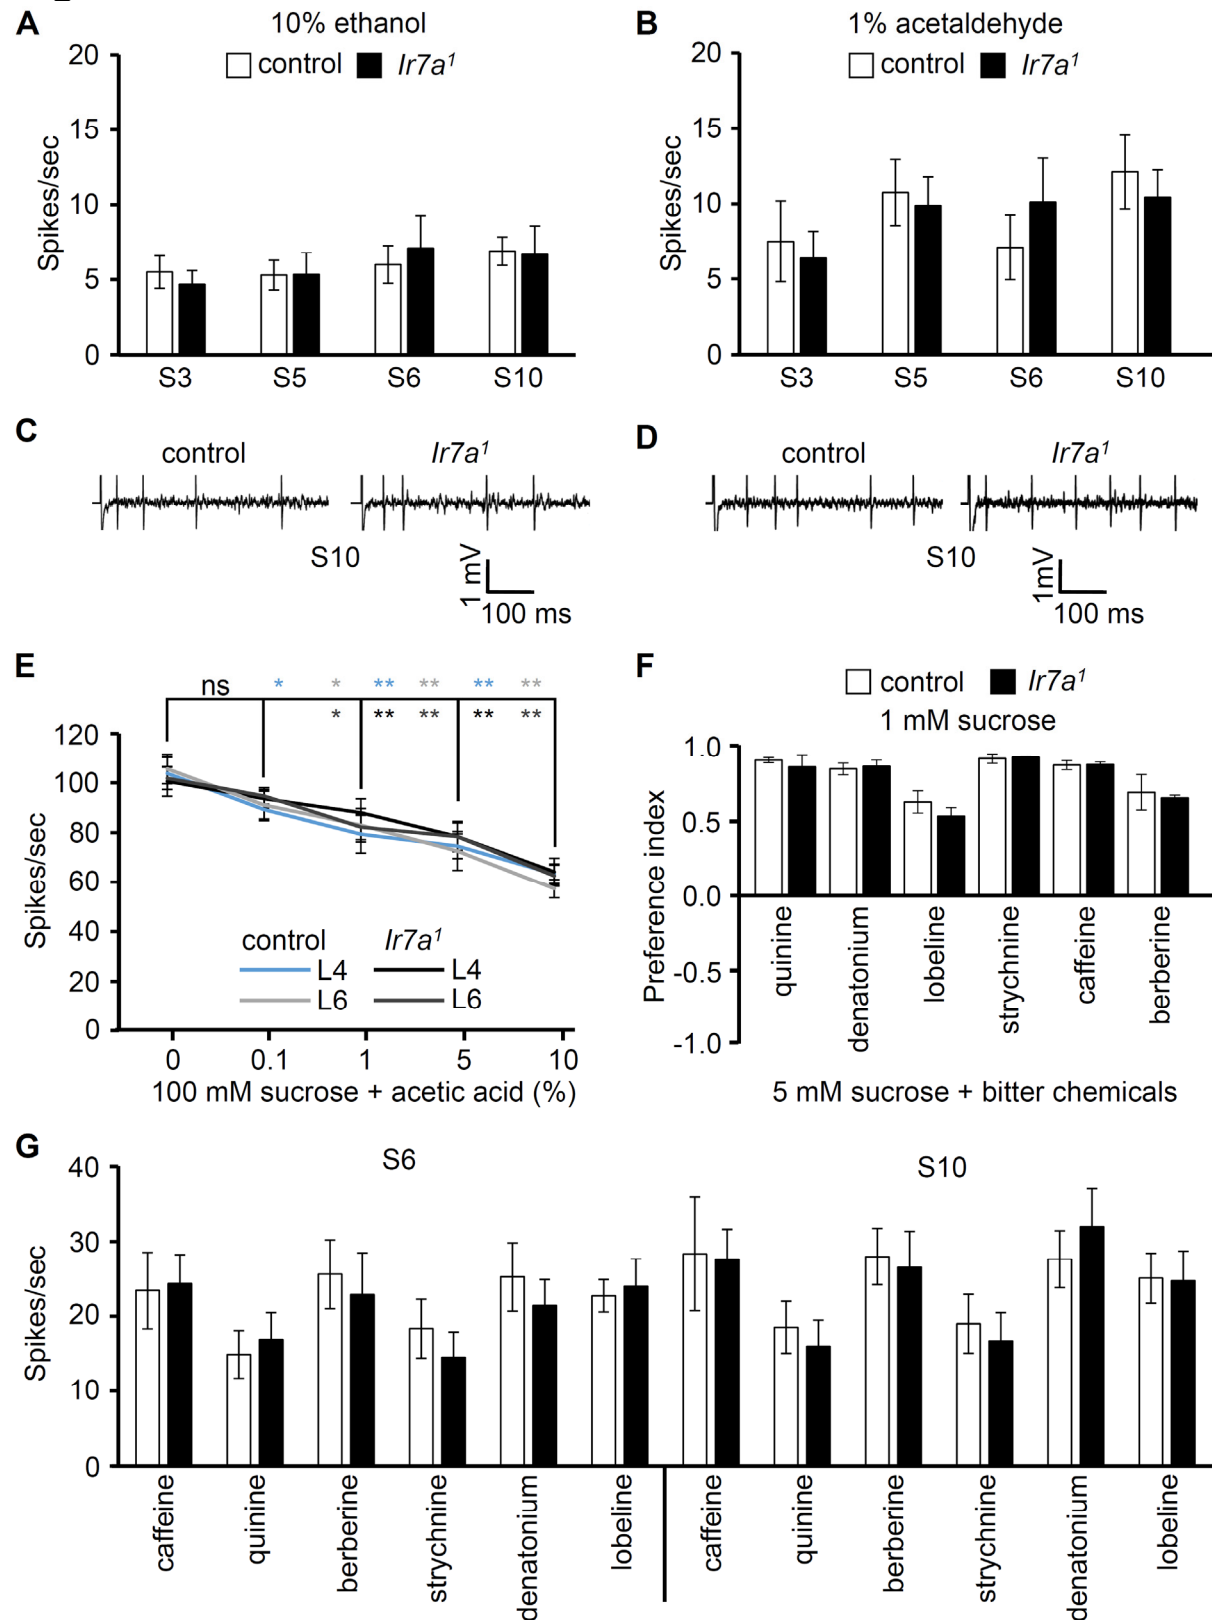

**Figure S5. Testing roles for *Ir7a* for acetic acid inhibition of sugar GRNs, and for sensing molecules with similar carbon backbones as acetic acid. Related to Figure 3.**

(A—B) Average frequencies of action potentials elicited by several S-type sensilla from control and *Ir7a*<sup>1</sup> flies in response to ethanol and acetaldehyde, which have similar carbon backbones as acetic acid.

(A) 10% ethanol. n=12-14.

(B) 1% acetaldehyde. n=15-19.

(C—D) Representative tip recording traces obtained from S10 sensilla from control and *Ir7a*<sup>1</sup> flies.

(C) 10% ethanol.

(D) 1% acetaldehyde.

(E) Average frequencies of action potentials elicited from L4 and L6 sensilla using 100 mM sucrose and the indicated concentrations of acetic acid. n=10-12. There are no significant differences between the control and the *Ir7a*<sup>1</sup> mutant.

(F) Two-way choice assays in response to 1 mM sucrose alone versus 5 mM sucrose plus bitter compounds at the following concentrations: 1 mM quinine, 0.3 mM denatonium, 0.3 mM lobeline, 0.5 mM strychnine, 10 mM caffeine, and 0.1 mM berberine. n=4-6.

(G) Average frequencies of action potentials elicited from S6 and S10 sensilla in response to 1 mM quinine, 1 mM denatonium, 1 mM lobeline, 1 mM strychnine, 10 mM caffeine, and 0.1 mM berberine. n=10-12.

The error bars represent SEMs. The asterisks indicate significant differences (\*p < 0.05, \*\*p < 0.01) using unpaired Student *t*-tests for comparing two sets of data or ANOVA with Scheffe's analysis as a *post hoc* test to compare two sets of data.

**Figure S6**

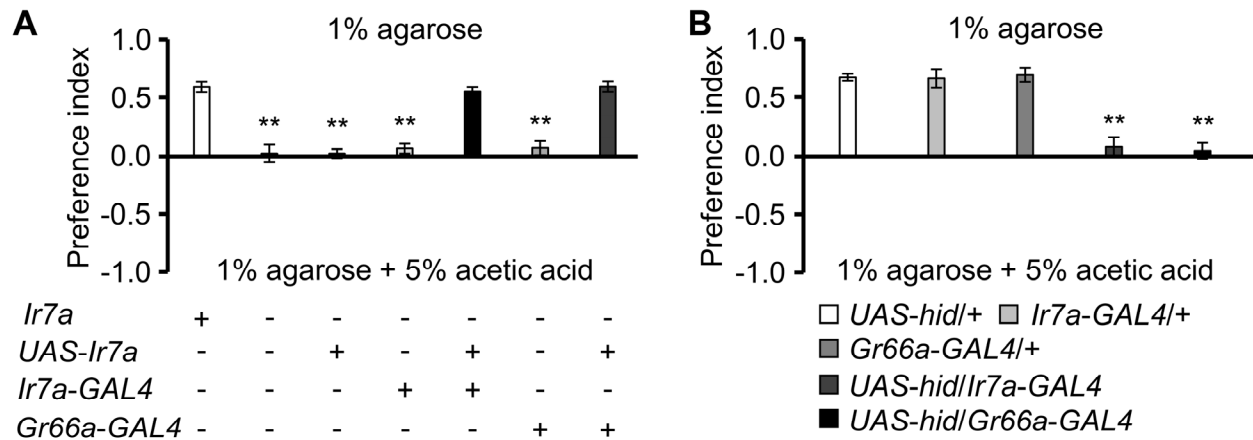

**Figure S6. Testing for rescue of *Ir7a*-dependent acetic acid repulsion and for the effect of killing *Ir7a* GRNs with *hid* using two-way choice assays without sugar. Related to Figure 4.**

(A) Two-way choice feeding assays without sucrose showing rescue of the avoidance defect in *Ir7a*<sup>1</sup> in response to 5% acetic acid. n=6.

(B) Two-way food choice assays without sucrose after expressing the cell death gene, *hid* (*UAS-hid*), under control of either the *Ir7a-GAL4* or the *Gr66a-GAL4*. n=6.

The error bars indicate SEMs. The asterisks indicate significant differences from the controls using ANOVA tests with Scheffe's *post hoc* analyses. \*\*p < 0.01.

**Figure S7**

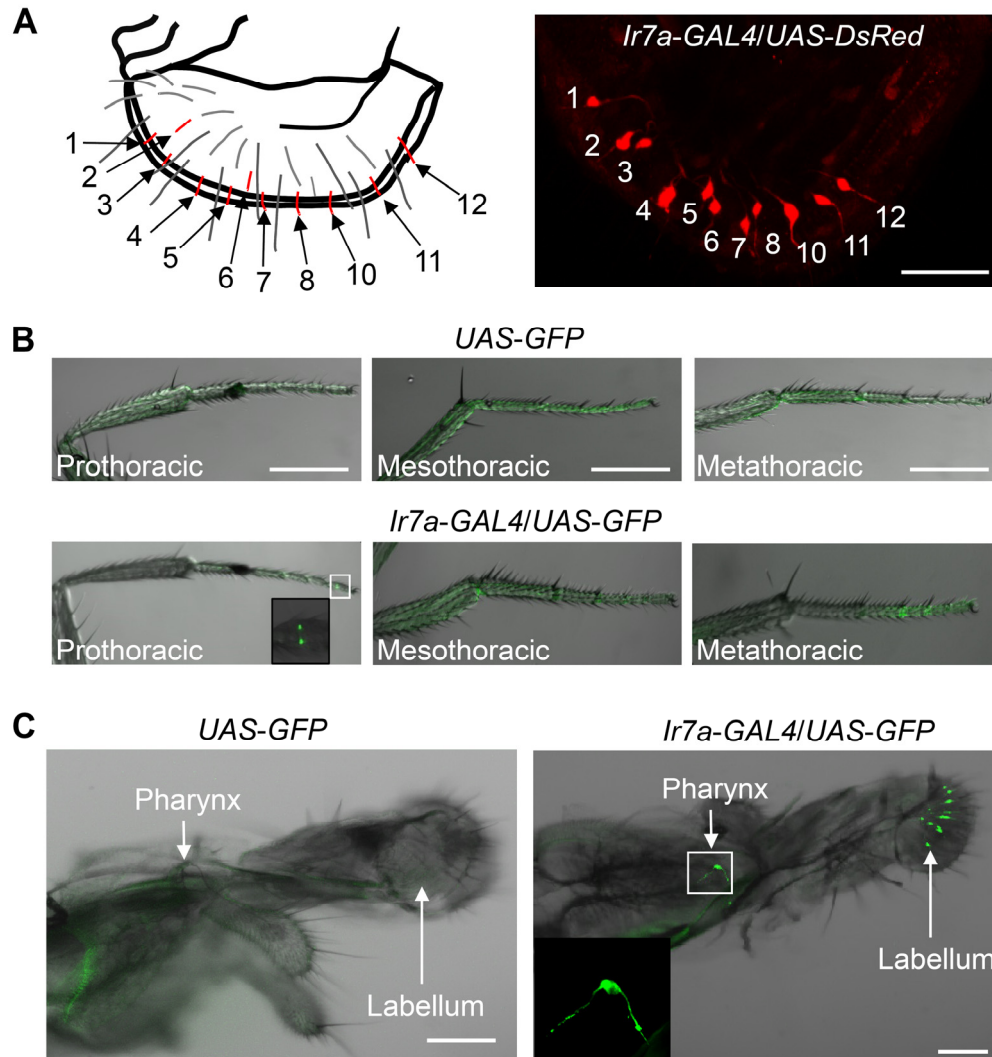

**Figure S7. Expression pattern of the *Ir7a-GAL4* reporter in the labellum, legs and pharynx. Related to Figure 5.**

*UAS-DsRed* was expressed under the control of the *Ir7a-GAL4*. The signals were detected by staining with anti-DsRed and viewed by confocal microscopy.

(A) Schematic representation of the 11 S-type sensilla in the labellum that were labeled by the *Ir7a-GAL4* reporter. This is the same image presented in Figure 5A. The scale bars represent 25  $\mu\text{m}$ .

(B) Expression of the *Ir7a* reporter in the legs of control ( $w^{1118}$ ) flies. The upper and lower panels show flies harboring the *UAS-GFP* transgene only, and *UAS-GFP* plus the *Ir7a-GAL4* transgenes, respectively. The inset in the image of the prothoracic leg is a magnified region indicated by the box. The scale bars represent 100  $\mu\text{m}$ .

(C) *Ir7a* reporter expression in the pharynx of control ( $w^{1118}$ ) flies. The panel on the left is a proboscis from a fly containing *UAS-GFP* transgene only. The panel on the right shows expression of *UAS-GFP* under control of the *Ir7a-GAL4*. The inset is a magnified region indicated by the box. The scale bars represent 100  $\mu\text{m}$ .
